# Supplementary material for: Role of Physico-Chemical and Cellular Conditions on the Bone Repair Potential of Plastically Compressed Collagen Hydrogels
Source: MDPI journal article supplement (doi:10.3390/gels10020130), 2024-02-06

## **Role of physico-chemical and cellular conditions on the bone repair potential of plastically-compressed collagen hydrogels**

Daline Mbitta Akoa, Ludovic Sicard, Christophe H  lary, Coralie Torrens, Brigitte Baroukh,

Anne Poliard, Thibaud Coradin

**Figure S1.** SEM images of hydrogels prepared in conditions H and I, aged 24 h and compressed.

**Figure S2.** Von Kossa staining of SHED-cellularized hydrogels after 25 days of culture

**Figure S3.** Alizarin Red staining of collagen hydrogels by h-DPSCs seeded at two cell densities after 25 days of culture

**Figure S1.** SEM images of hydrogels prepared in conditions H and I, aged 24 and compressed.  
Scale bar: 2  $\mu\text{m}$ .

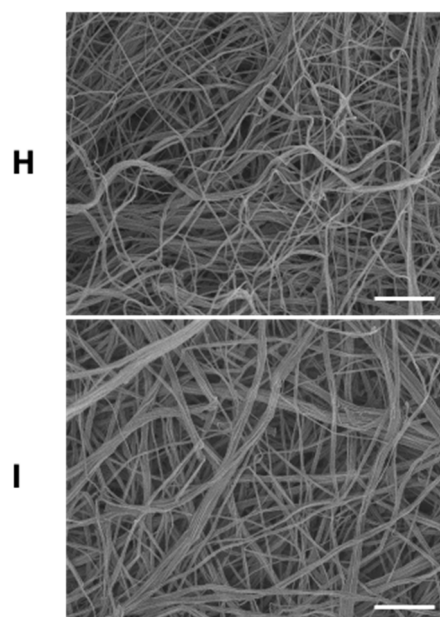

**Figure S2.** Von Kossa staining of SHED-cellularized hydrogels after 25 days of culture.

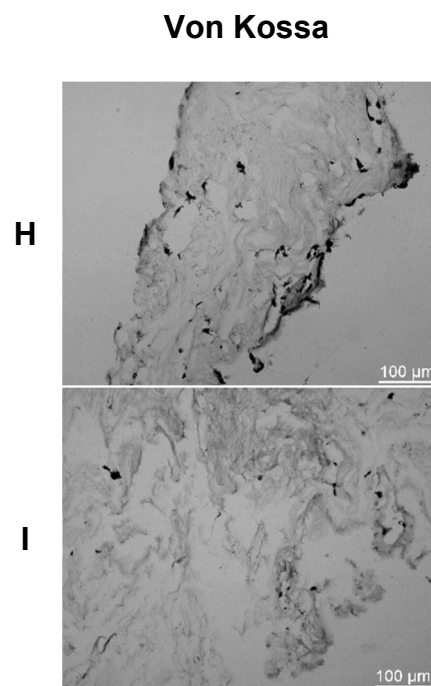

**Figure S3.** Alizarin Red staining of collagen hydrogels by h-DPSCs seeded at two cell densities after 25 days of culture.

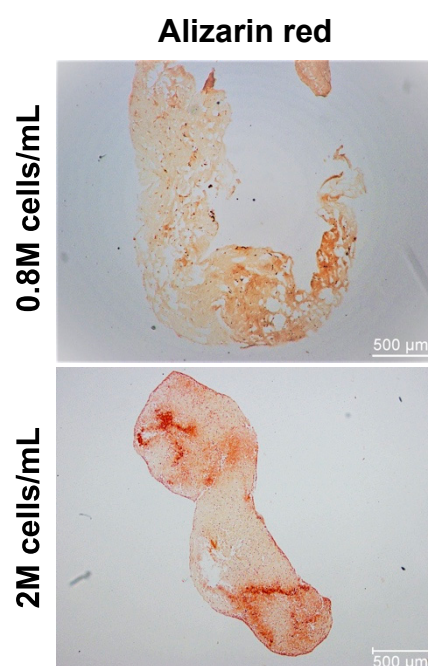

Supplement: s1 [file s1]
